# Supplementary material
Source: PubMed Central journal article supplement (PMC3799853)

## Supporting Information

### Oligodeoxynucleotides containing multiple thiophene-modified isomorphous fluorescent nucleosides

Mary S. Noé, Renatus W. Sinkeldam, and Yitzhak Tor\*

*University of California, San Diego, Department of Chemistry and Biochemistry, La Jolla, California 92093 (USA).*

\*to whom correspondence should be addressed: [ytor@ucsd.edu](mailto:ytor@ucsd.edu)

#### Contents:

- **S.1** Photophysical studies.....S2
  - **Figure S1.1** Stern-Volmer plot of **1** in water.....S2
  - **Figure S1.2** Temperature dependent fluorescence spectra for ds **4•6** in triplicate .....S2
  - **Figure S1.3** Temperature dependent fluorescence spectra for ss **4** in triplicate .....S2
  - **Figure S1.4** Temperature dependent fluorescence spectra for ds **5•7** in triplicate .....S2
  - **Figure S1.5** Temperature dependent fluorescence spectra for ss **5** in triplicate .....S3
- **S.3** NMR spectra of compound **2**.....S3

## S1 Spectra and graphs

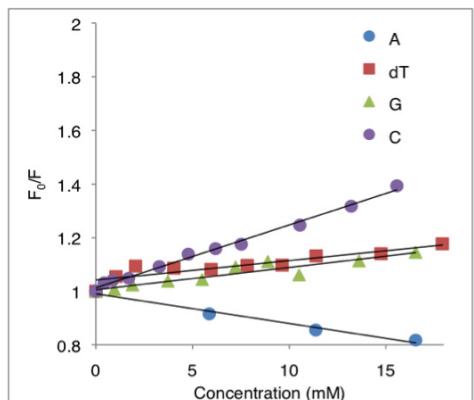

**Figure S1.1.** Stern-Volmer plot of the fluorescence intensity of **1** in the presence of increasing concentrations of each native nucleotide (AMP, dTMP, GMP, and CMP) in water.

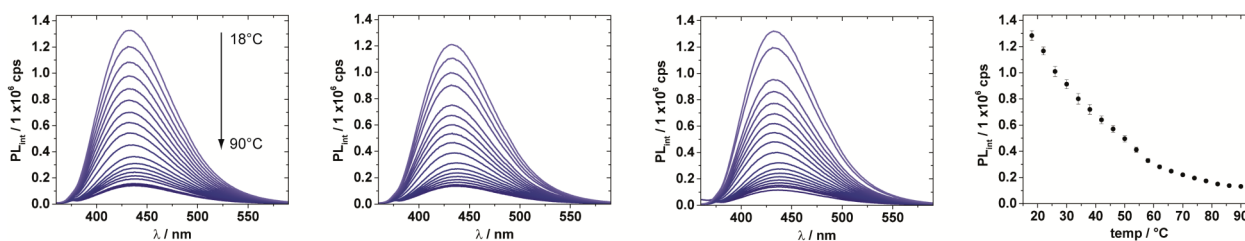

**Figure S1.2.** Temperature dependent fluorescence spectra for ds **4•6** in triplicate, and a plot of the change in fluorescence intensity at 433 nm as a function of temperature.

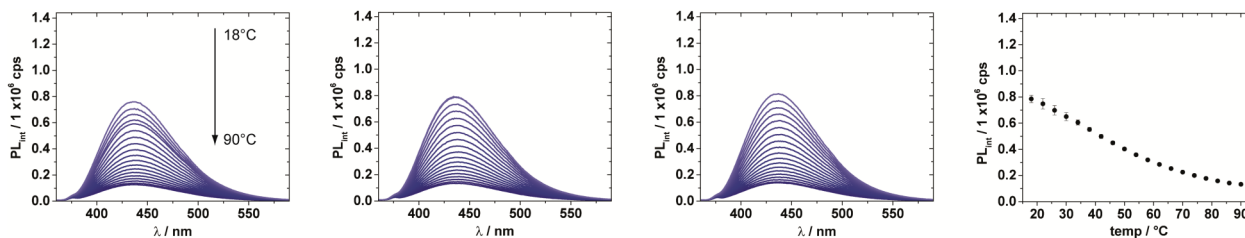

**Figure S1.3.** Temperature dependent fluorescence spectra for ss **4** in triplicate, and a plot of the change in fluorescence intensity at 433 nm as a function of temperature.

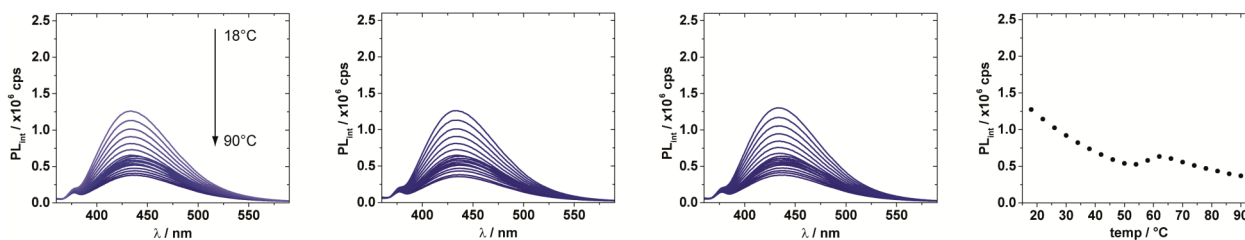

**Figure S1.4.** Temperature dependent fluorescence spectra for ds **5•7** in triplicate, and a plot of the change in fluorescence intensity at 433 nm as a function of temperature.

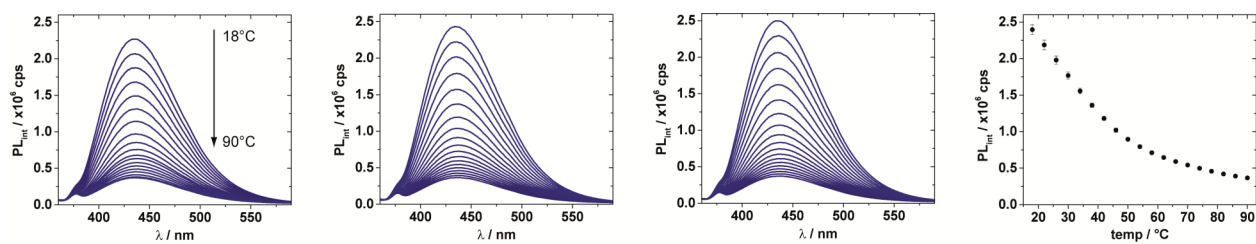

**Figure S1.5.** Temperature dependent fluorescence spectra for ss **5** in triplicate, and a plot of the change in fluorescence intensity at 433 nm as a function of temperature.

## S.2 NMR Spectra

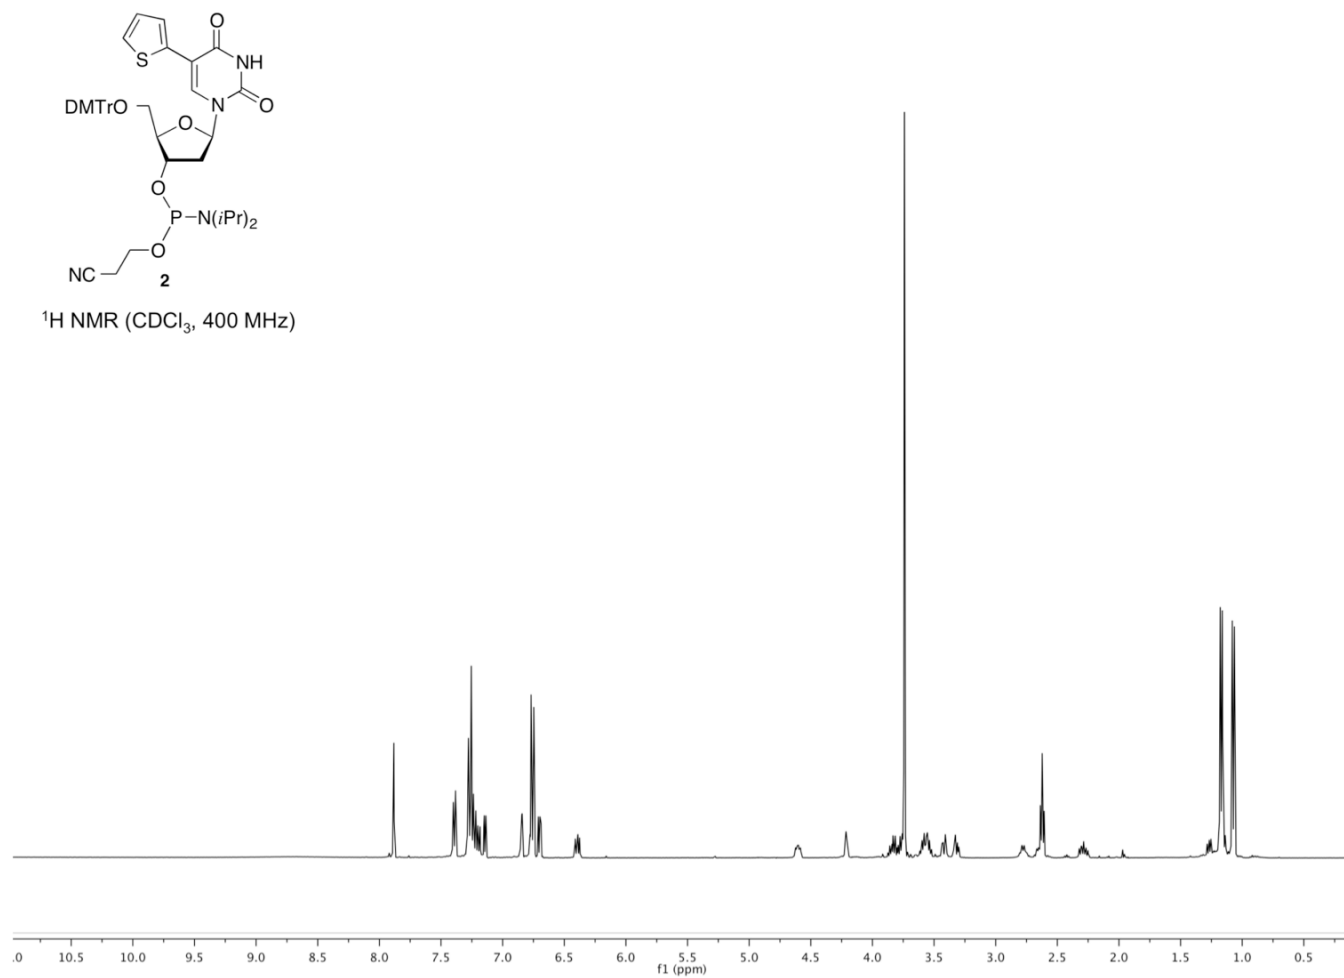

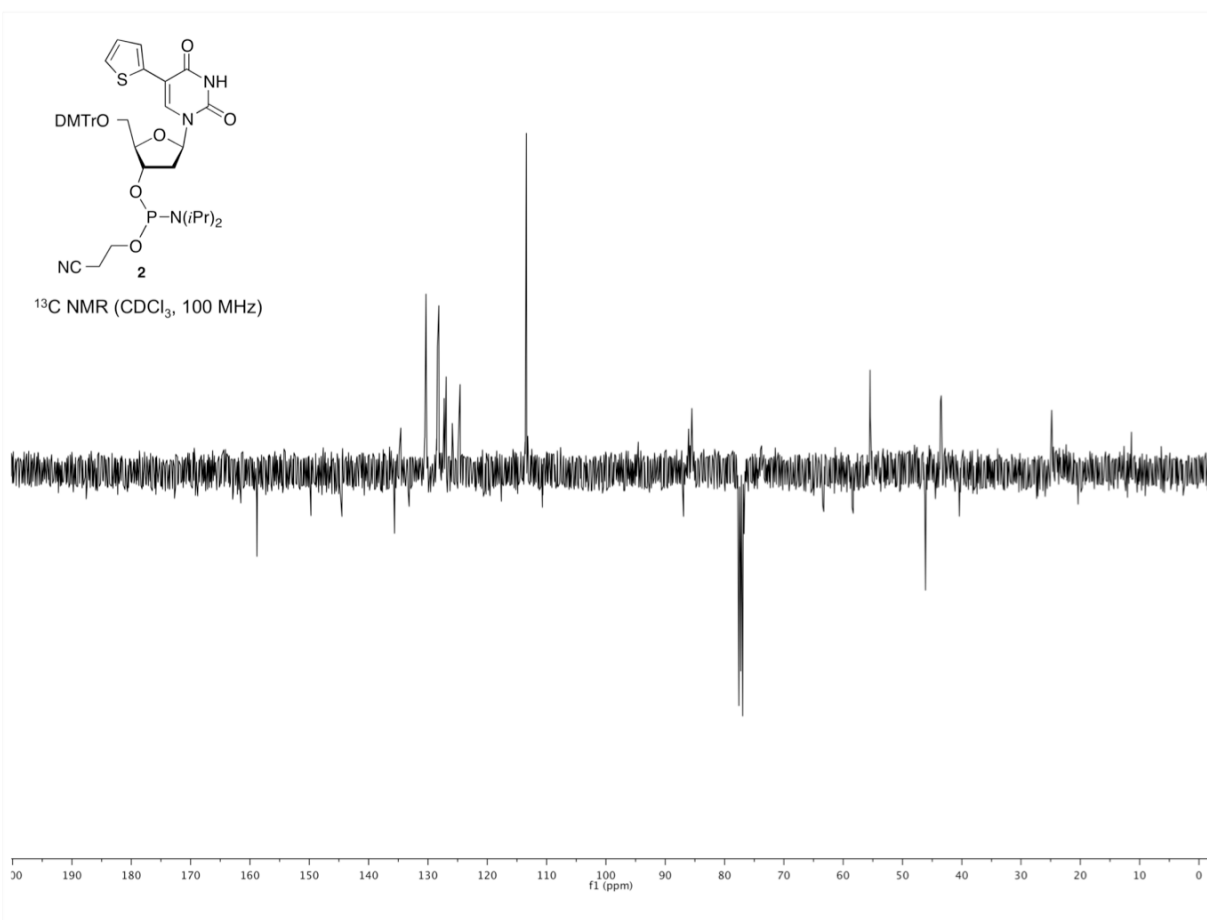

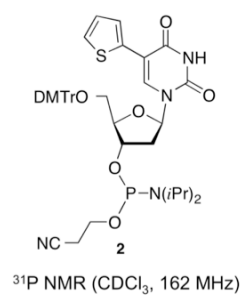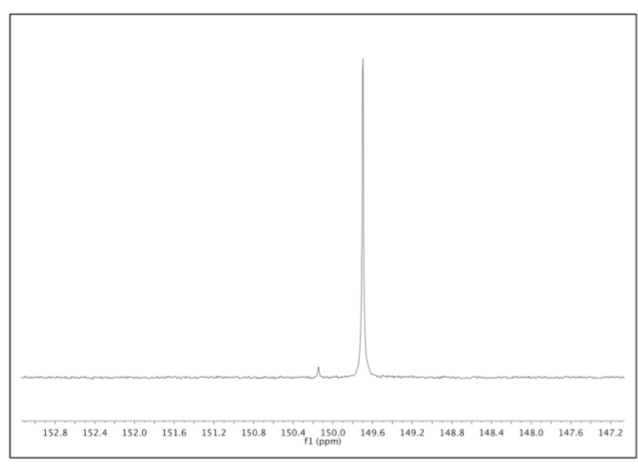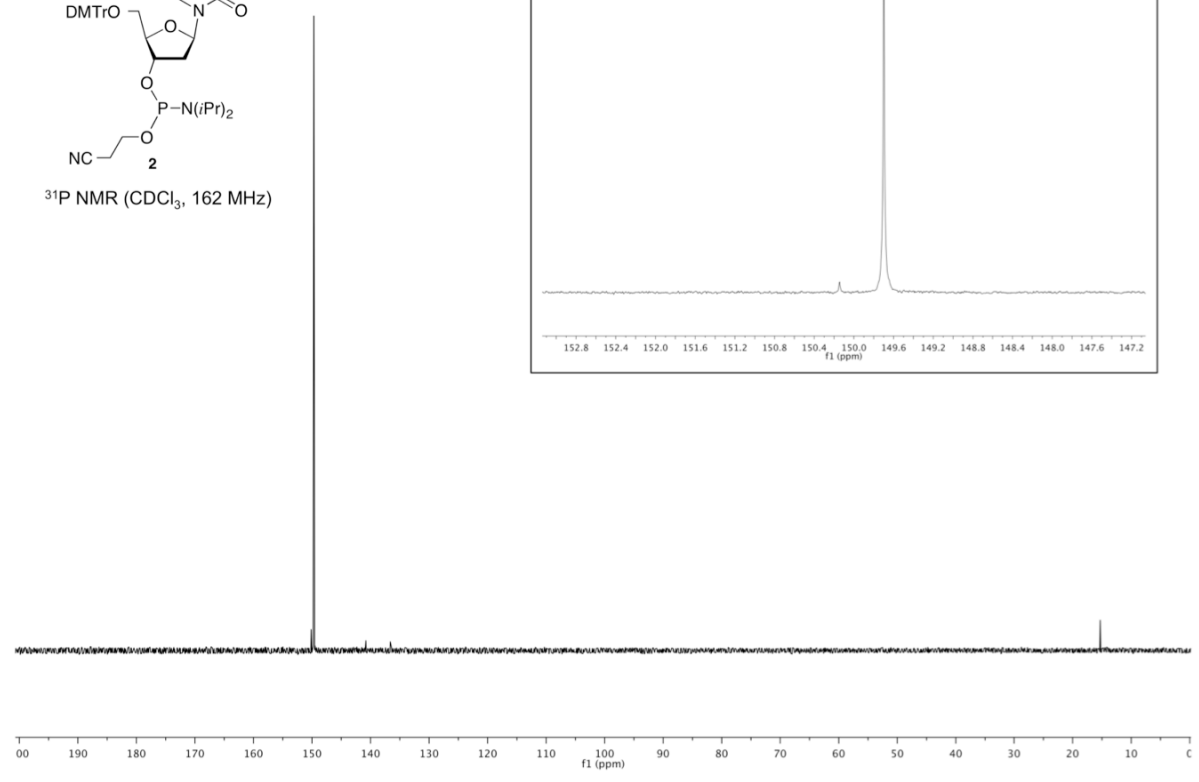

Supplement: NIHMS508341-supplement-1_si_001.pdf [file NIHMS508341-supplement-1_si_001.pdf]
